# Supplementary material
Source: PubMed Central journal article supplement (PMC2712891)
Supplement: NIHMS107078-supplement-supplement.pdf [file NIHMS107078-supplement-supplement.pdf]

## Supplemental Figures, Table and Movie

### Figure S1. Misoriented GSCs are not permanently arrested.

- A. BrdU labeling outcome after 5 days of feeding (at day 10 of age). Almost all GSCs (and other germ cells) were labeled.
- B. BrdU dilution during the chase period. Labeling completely disappeared 5 days later. Data are expressed as mean  $\pm$  SD.

### Figure S2. Increase in frequency of LacZ<sup>+</sup> GSCs with age.

Mean (%)  $\pm$  SD. Number of the GSCs counted for each time point is shown at the top of the graph.

### Figure S3. Examples of LacZ<sup>-</sup> (left) and LacZ<sup>+</sup> (right) dedifferentiation.

Flies were irradiated with 2000 or 3000 rad and analyzed 24 hours later. Remnant of Ring canal (arrowhead) and disintegrating fusome (arrow) are indicated.

Red; LacZ and Adducine. Green; Anillin. Blue; Vasa. Bar; 10 $\mu$ m. Hub (\*).

**Table S1. Centrosome misorientation frequency and GSC number in older flies.**

| Strain <sup>1</sup> ; age            | Centrosome misorientation %<br>(n=GSCs counted) | GSC number /testis <sup>2</sup><br>(n=testes counted) | % survival at the day of sampling |
|--------------------------------------|-------------------------------------------------|-------------------------------------------------------|-----------------------------------|
| <i>yw</i> ; 42 days +YP <sup>3</sup> | 35.5% (n=332)                                   | 6.54±2.2 (n=59)                                       | 9.1% (~40/440)                    |
| <i>yw</i> ; 42 days                  | 39.1% (n=64)                                    | 5.7±2.42 (n=13)                                       | 3.1% (~10/320)                    |
| LacZ <sup>4</sup> ; 40 days          | 42.3% (n=234)                                   | 6.36±1.89 (n=69)                                      | 42.9% (~180/420)                  |
| LacZ <sup>4</sup> ; 50 days          | 45.1% (n=417)                                   | 6.11±1.5 (n=81)                                       | 31.0% (~100/320)                  |

1. Strains used; *yw*, as used in Figure 1, 2 and 3.

LacZ, as used in Figure 5 and 6

2. GSC number ± SD / testis

3. +YP; yeast paste was supplemented for better survival.

4. Centrosome misorientation and GSC number of LacZ strain were comparable to those of *yw* at day 0 (9.0% misorientation (n=311 GSCs) and 9.3±1.5 GSCs/testis (n=44 testes)).

**Movie S1. Time-lapse live imaging of centrosome behavior in a misoriented GSC.**

Centrosome movement was tracked by Sas-6-mCherry. Hub (\*) and two centrosomes (red and blue arrowhead) in an originally misoriented GSC (surrounded by yellow dotted line) are marked in 5 frames during the movie. The GSC entered mitosis right after centrosome re-orientation occurred. One second corresponds to 6 min in a real time.

Yamashita Figure S1

**A**

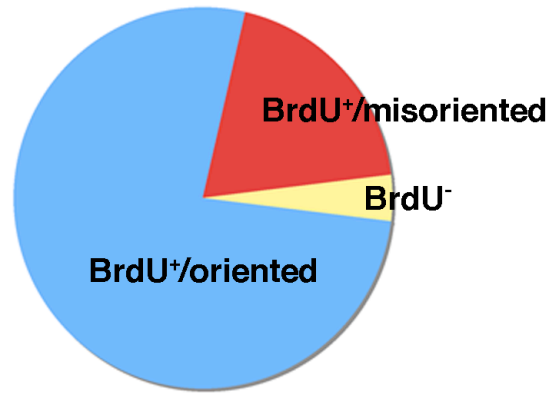

**B**

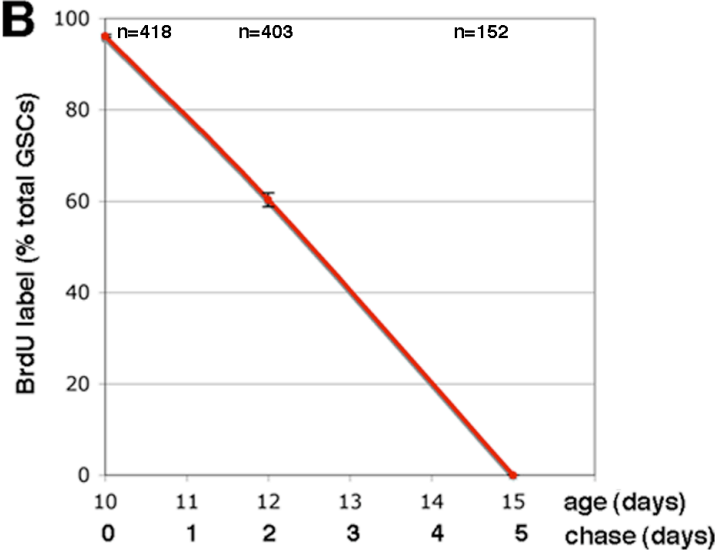

Yamashita Figure S2

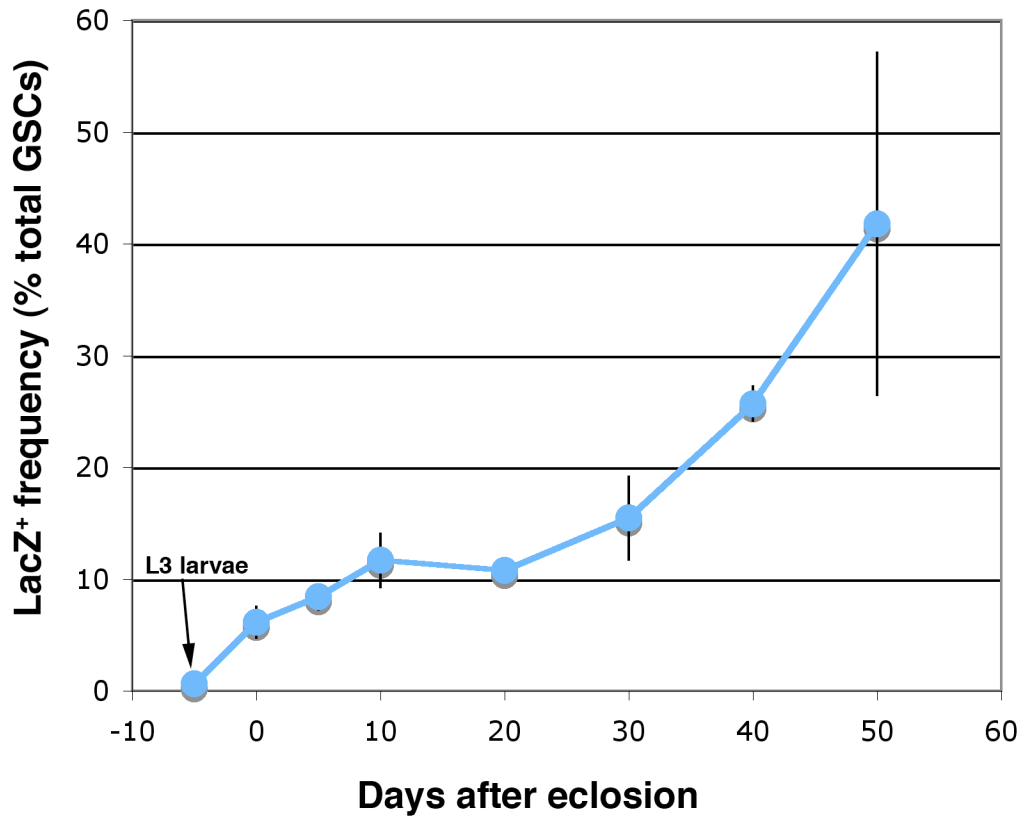

### Yamashita Figure S3

LacZ-

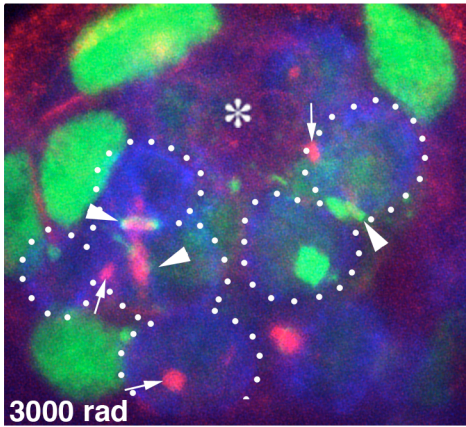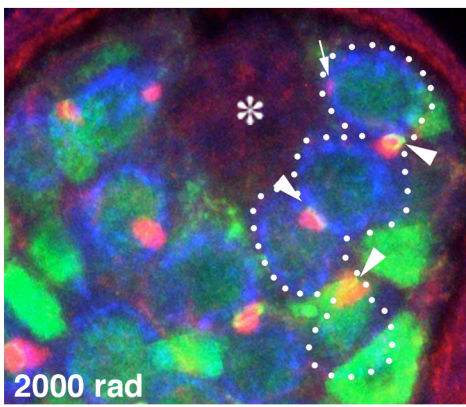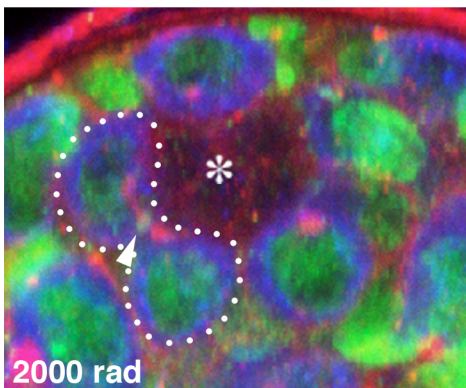

LacZ+

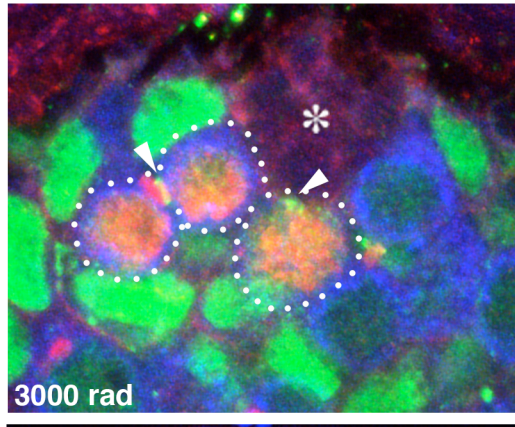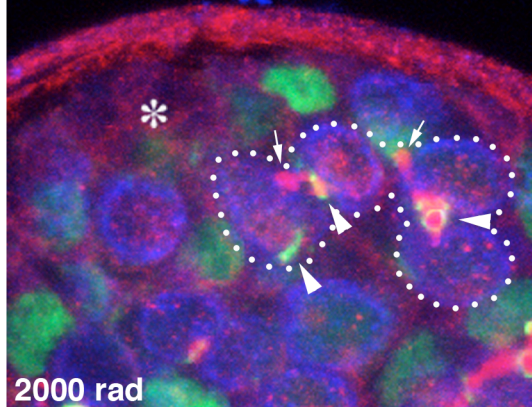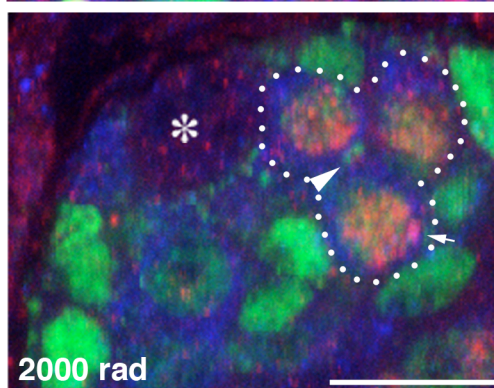

LacZ, Adducin Anillin Vasa
